# Supplementary material for: Improving Pharmacists’ Awareness of Inadequate Antibiotic Use for URTIs through an Educational Intervention: A Pilot Study
Source: MDPI journal article supplement (doi:10.3390/healthcare10081385), 2022-07-25
Supplement: s1 [file s1]

# Questionário de avaliação do curso online e da app eHealthResp - Farmacêuticos

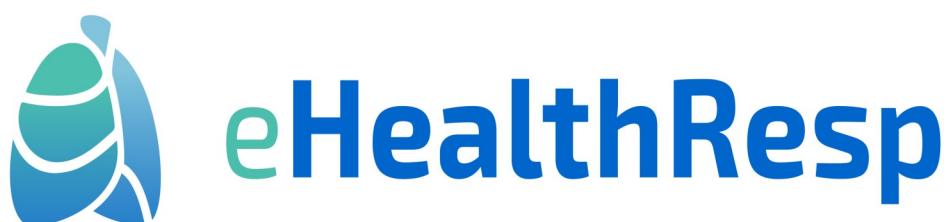

A resistência aos antibióticos é um dos principais problemas de saúde pública da atualidade e o uso inadequado de antibióticos constitui um importante determinante no desenvolvimento de resistências bacterianas. Neste sentido, o projeto intitulado “Desenvolvimento e validação de ferramentas e-Health de apoio à decisão clínica e ao empoderamento do doente nas infeções respiratórias: ensaio controlado aleatório por clusters.” pretende avaliar a eficácia de ferramentas e-Health de apoio à decisão clínica e ao empoderamento dos doentes na gestão de situações clínicas do trato respiratório superior.

Foi desenhada uma intervenção educativa de reforço que inclui uma intervenção multifacetada em centros de saúde e farmácias, um curso online, um sistema de apoio à decisão clínica para os médicos e farmacêuticos, bem como uma ferramenta e-Health para os doentes. Este estudo apresenta, como principal objetivo, a validação global do curso *online* eHealthResp (constituído por uma série de apresentações e vários casos clínicos sobre infeções respiratórias superiores em adultos) e da aplicação móvel eHealthResp, por um grupo de médicos e farmacêuticos.

O questionário do presente estudo encontra-se dividido em três partes. A primeira parte, constituída por cinco breves questões, permitirá a recolha de dados sociodemográficos, como sexo, anos de experiência, nível de educação e a sua especialidade. A segunda parte contém quatro grupos de questões de resposta fechada, e a terceira parte consiste em quatro questões de resposta aberta, ambas com o objetivo de avaliar os elementos curso online e da *app* móvel.

Agradecemos desde já a sua colaboração. Caso seja necessário algum esclarecimento adicional sobre o estudo em questão, não hesite em contactar a equipa de investigação para o seguinte e-mail: [ibimed-ehealthresp@ua.pt](mailto:ibimed-ehealthresp@ua.pt).

Muito obrigado.

A equipa eHealthResp

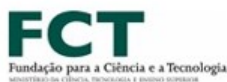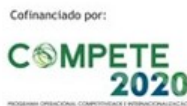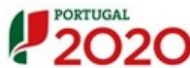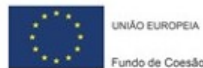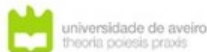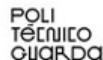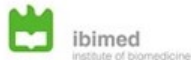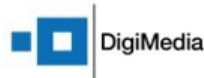

Este inquérito é anónimo.

O registo das respostas ao inquérito não contém qualquer informação sobre a sua identidade, excepto se alguma pergunta do inquérito solicitar alguma identificação e a fornecer.

Se usou um código para aceder a este inquérito este código não será guardado junto com as suas respostas. O código é gerido numa base de dados separada e apenas é utilizado pelo programa para registar que concluiu o inquérito. Não há forma de relacionar os códigos dos convidados a participar no inquérito com as respostas dadas.

## Consentimento informado

O presente estudo enquadra-se no projeto “Desenvolvimento e validação de ferramentas *e-Health* de apoio à decisão clínica e ao empoderamento do doente nas infeções respiratórias: ensaio controlado aleatório por clusters.”, com a referência PTDC/SAU-SER/31678/2017, financiado por fundos nacionais através da FCT/MCTES e pelo COMPETE-2020 – Programa Operacional Competitividade e Internacionalização (POCI), na sua componente FEDER, e apresenta como principal objetivo a validação de quatro algoritmos sobre infeções respiratórias superiores em adultos, associados ao curso *online* eHealthResp, para serem utilizados através de uma aplicação móvel (*App* eHealthResp).

O estudo dá cumprimento ao estipulado no Regulamento Geral de Proteção de Dados (RGPD) garantindo a segurança e confidencialidade de todos os dados facultados pelos participantes, assim como a garantia de que as respostas facultadas pelos mesmos nunca serão associadas com a sua identidade. Todos os dados recolhidos serão encriptados e arquivados eletronicamente, e só os investigadores do projeto terão acesso aos mesmos. As responsáveis pelo tratamento e recolha dos seus dados são Maria Teresa Herdeiro (iBiMED-UA) e Fátima Roque (IPG). Assegura-se ainda a total destruição de todos os dados após a apresentação do relatório sobre os resultados da implementação do projeto e finalização do mesmo, previsivelmente no final do mês de julho de 2022. Os resultados serão divulgados exclusivamente em contexto científico (em apresentações ou publicações), sendo tratados de forma agregada, e nunca individualmente. É possível desistir do estudo em qualquer momento.

Poderá exercer os seus direitos de acesso, retificação, eliminação, limitação e oposição, sempre que necessário, contactando por e-mail as investigadoras responsáveis pelo projeto, Maria Teresa Herdeiro (iBiMED-UA) e Fátima Roque (IPG), para o e-mail [ibimed-ehealthresp@ua.pt](mailto:ibimed-ehealthresp@ua.pt) (<mailto:ibimed-ehealthresp@ua.pt>). Poderá ainda contactar o Encarregado de Proteção de Dados da Universidade de Aveiro [epd@ua.pt](mailto:epd@ua.pt) (<mailto:epd@ua.pt>). Caso seja necessário, poderá ainda apresentar reclamação à Comissão Nacional de Proteção de Dados em [cnpd.pt](http://cnpd.pt) (<https://cnpd.pt>).

**\*Declaro que li e compreendi a informação que consta neste documento e que fui devidamente informado(a) e esclarecido(a) acerca dos objetivos e das condições de participação neste estudo e que, como tal:**

- ☒ ACEITO participar neste estudo
- ☐ NÃO ACEITO participar neste estudo

## Dados demográficos

### \*Sexo:

♀  
Feminino

♂  
Masculino

### \*Idade:

📌 Verifique o formato da sua resposta.

### \*Habilitações académicas:

📌 Selecione todas as opções que se apliquem

- ☐ Licenciatura
- ☐ Pós-Graduação
- ☐ Mestrado
- ☐ Doutoramento

### \*Especialidade:

📌 Selecione todas as opções que se apliquem

- ☐ Doenças Infeciosas
- ☐ Medicina do Trabalho
- ☐ Medicina Geral e Familiar
- ☐ Medicina Interna

☐ Otorrinolaringologia

☐ Patologia Clínica

☐ Pneumologia

☐ Saúde Pública

☐ Outro:

**\*Há quantos anos exerce a sua profissão?**

**i** Verifique o formato da sua resposta.

## Medidas de avaliação gerais do curso online eHealthResp

Por favor atribua uma classificação a cada um dos parâmetros abaixo apresentados, considerando a seguinte escala:

★ Discordo totalmente    ★★ Discordo    ★★★ Neutro    ★★★★ Concordo    ★★★★★ Concordo totalmente

**\*Formato:** A apresentação destes conteúdos em formato digital é adequada.

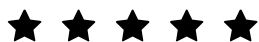

**\*Utilidade:** Considero que a informação/conhecimento fornecida(o) pelo presente curso *online* é útil e que pode melhorar o processo de tomada de decisão clínica.

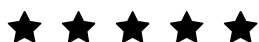

**\*Interesse:** Recomendaria o curso *online* eHealthResp a um colega.

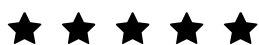

**\*Confiança:** Tenho confiança nos conteúdos apresentados no curso *online*.

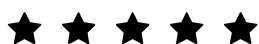

## Medidas de avaliação dos módulos constituintes do curso online eHealthResp

Por favor atribua uma classificação a cada um dos parâmetros abaixo apresentados, considerando a seguinte escala:

★ Discordo totalmente    ★★ Discordo    ★★★ Neutro    ★★★★ Concordo    ★★★★★ Concordo totalmente

\*

### Cuidados farmacêuticos em afeções respiratórias

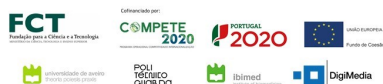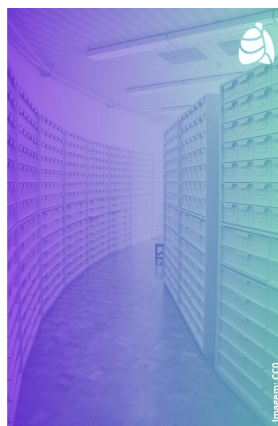

#### Módulo 0

**Adequação:** Considero que os conteúdos deste módulo são adequados.

★ ★ ★ ★ ★

**\*Correção:** Considero que os conteúdos deste módulo estão corretos e de acordo com a literatura.

★ ★ ★ ★ ★

**\*Completo:** Considero que os conteúdos deste módulo estão completos.

★ ★ ★ ★ ★

\*

### Estados gripais e constipação

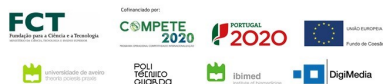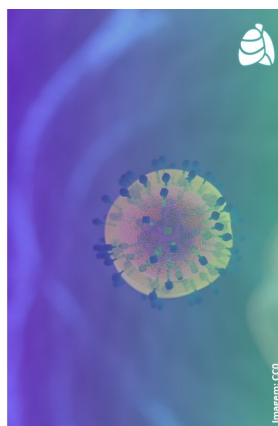

#### Módulo 1

**Adequação:** Considero que os conteúdos deste módulo são adequados.

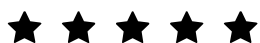

**\*Correção:** Considero que os conteúdos deste módulo estão corretos e de acordo com a literatura.

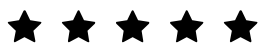

**\*Completude:** Considero que os conteúdos deste módulo estão completos.

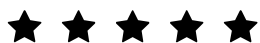

\*

## Traqueobronquite, faringoamigdalite e rinossinusite

FCT  
Fundação para a Ciência e a Tecnologia

Co-financiado por:  
COMPETE  
2020

PORTUGAL  
2020

UNião Europeia  
Fundos de Coesão

Universidade de Aveiro  
Faculdade de Ciências

POLI  
TÉCNICO  
OUPR.DA

ibimed  
Instituto de Imunologia

DigiMedia

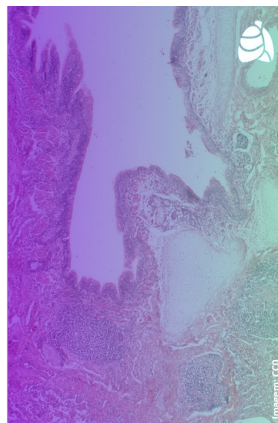

### Módulo 2

**Adequação:** Considero que os conteúdos deste módulo são adequados.

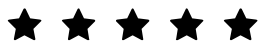

**\*Correção:** Considero que os conteúdos deste módulo estão corretos e de acordo com a literatura.

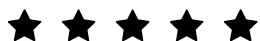

**\*Completude:** Considero que os conteúdos deste módulo estão completos.

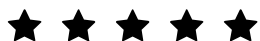

\*

## Protocolo de atuação

FCT  
Fundação para a Ciência e a Tecnologia

Co-financiado por:  
COMPETE  
2020

PORTUGAL  
2020

UNião Europeia  
Fundos de Coesão

Universidade de Aveiro  
Faculdade de Ciências

POLI  
TÉCNICO  
OUPR.DA

ibimed  
Instituto de Imunologia

DigiMedia

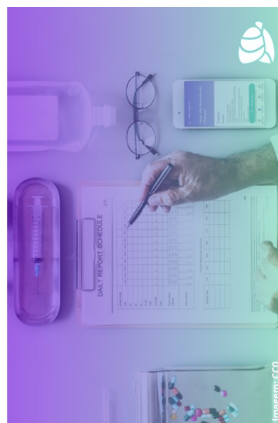

### Módulo 3

**Adequação:** Considero que os conteúdos deste módulo são adequados.

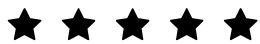

**\*Correção:** Considero que os conteúdos deste módulo estão corretos e de acordo com a literatura.

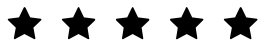

**\*Completeness:** Considero que os conteúdos deste módulo estão completos.

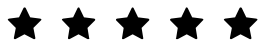

## Medidas de avaliação dos casos clínicos constituintes do curso online eHealthResp

Por favor atribua uma classificação a cada um dos parâmetros abaixo apresentados, considerando a seguinte escala:

★ Discordo totalmente    ★★ Discordo    ★★★ Neutro    ★★★★ Concordo    ★★★★★ Concordo totalmente

\*

### Caso clínico 1

*Adulto de 50 anos com febre desde ontem, calafrios, dores de cabeça e mialgias que aumentam. Sem sintomas nasais, sem tosse ou dor de garganta.*

**Adequação:** Considero que os conteúdos, estrutura e apresentação deste caso clínico são adequados.

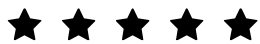

**\*Correção:** Considero que os conteúdos, estrutura e apresentação deste caso clínico estão corretos e de acordo com a literatura.

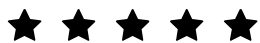

**\*Completeness:** Considero que os conteúdos, estrutura e apresentação deste caso clínico estão completos.

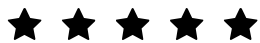

\*

### Caso clínico 2

*Adulto de 38 anos, com muita congestão e obstrução nasal, com espirros esporádicos há mais de uma semana, não febril, com secreção nasal aquosa, perda de olfato e sem histórico de rinite alérgica.*

**Adequação:** Considero que os conteúdos, estrutura e apresentação deste caso clínico são adequados.

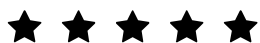

**\*Correção:** Considero que os conteúdos, estrutura e apresentação deste caso clínico estão corretos e de acordo com a literatura.

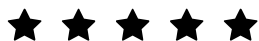

**\*Completude:** Considero que os conteúdos, estrutura e apresentação deste caso clínico estão completos.

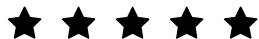

**\***

### Caso clínico 3

*Jovem adulta de 22 anos de idade com febre de 38,5°C, calafrios, dor de garganta intensa há 2 dias, principalmente ao engolir.*

**Adequação:** Considero que os conteúdos, estrutura e apresentação deste caso clínico são adequados.

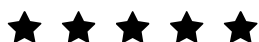

**\*Correção:** Considero que os conteúdos, estrutura e apresentação deste caso clínico estão corretos e de acordo com a literatura.

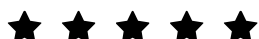

**\*Completude:** Considero que os conteúdos, estrutura e apresentação deste caso clínico estão completos.

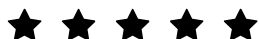

**\***

### Caso clínico 4

*Adulto 60 anos, fumador, com bronquite ocasional, apresenta muco e tosse produtiva intensa há uma semana. Febre de 39,2°C com taquicardia e calafrios. Sem sintomas nasais ou dor de garganta.*

**Adequação:** Considero que os conteúdos, estrutura e apresentação deste caso clínico são adequados.

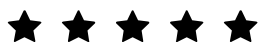

**\*Correção:** Considero que os conteúdos, estrutura e apresentação deste caso clínico estão corretos e de acordo com a literatura.

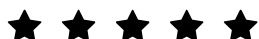

**\*Completude:** Considero que os conteúdos, estrutura e apresentação deste caso clínico estão completos.

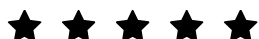

## Medidas de avaliação gerais da aplicação móvel eHealthResp

Por favor atribua uma classificação a cada um dos parâmetros abaixo apresentados, considerando a seguinte escala:

★ Discordo totalmente    ★★ Discordo    ★★★ Neutro    ★★★★ Concordo    ★★★★★ Concordo totalmente

**\*Adequação:** Considero que os conteúdos e informação fornecidos pela aplicação móvel são adequados.

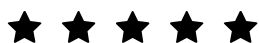

**\*Correção:** Considero que os conteúdos e informação fornecidos pela aplicação móvel estão corretos e de acordo com a literatura.

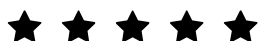

**\*Compleitude:** Considero que os conteúdos e informação fornecidos pela aplicação móvel estão completos.

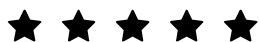

**\*Formato:** A apresentação destes conteúdos em formato digital é adequada.

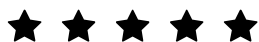

**\*Utilidade:** Considero que a informação/conhecimento fornecidos/adquiridos pela presente aplicação móvel são úteis e que podem melhorar o processo de tomada de decisão clínica.

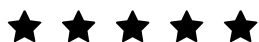

**\*Interesse:** Recomendaria a aplicação móvel eHealthResp a um colega.

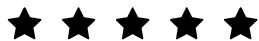

**\*Confiança:** Tenho confiança nos conteúdos apresentados na aplicação móvel.

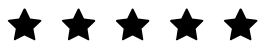

## Questões de resposta aberta

---

---

**\*Curso *online* eHealthResp:**

**O que mais gostou no curso?**

**O que menos gostou no curso?**

**Sente que beneficiou com o curso?**

Em caso afirmativo, de que forma?

Em caso negativo, quais os motivos?

**\*Aplicação móvel eHealthResp:**

**O que mais gostou na aplicação móvel?**

**O que menos gostou na aplicação móvel?**

**Sente que o uso da aplicação o(a) beneficiou a estabelecer um melhor diagnóstico?**

Em caso afirmativo, de que forma?

Em caso negativo, quais os motivos?

**Observações/comentários relativamente ao curso e/ou aplicação móvel eHealthResp:**

**\*** A resistência aos antibióticos é um dos principais problemas de saúde pública da atualidade e o uso inadequado de antibióticos constitui um importante determinante no desenvolvimento de resistências bacterianas. Para combater este problema foi desenvolvida uma intervenção educativa que consiste no presente curso online e aplicação móvel eHealthResp, tendo como principal objetivo promover a redução da prescrição inadequada de antibióticos entre os profissionais de saúde.

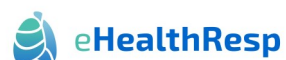

**Considerando o objetivo do estudo acima mencionado, no geral pensa que esta intervenção educativa multifacetada poderá ser eficaz na melhoria da qualidade de prescrição de antibióticos?**

Submeter
